# Supplementary material for: Effect of miR-143-3p from Extracellular Vesicles of Porcine Uterine Luminal Fluid on Porcine Trophoblast Cells
Source: MDPI journal article supplement (doi:10.3390/ani12233402), 2022-12-02
Supplement: s1 [file s1]

Table S1 Primer information

| Primer name            | Sequence of primers                                      |
|------------------------|----------------------------------------------------------|
| <i>GPD2</i>            | F: CAAATGGATGAAAACACGCTT<br>R: TCCACAACCTTCGGTCTACAGG    |
| <i>β-actin</i>         | F: GTCATGGACTCTGGGGATGG<br>R: TTCTCCTTGATGTCCCGCAC       |
| <i>ssc-pre-mir-143</i> | F: AGTGCTGCATCTCTGGTCAGCTG<br>R: GCAGCAGAGCAGCTTCTCCCTTC |
| <i>ssc-pri-mir-143</i> | F: AAGGGAAAGCAAGGTGGAGGC<br>R: GCAGCAGAGCAGCTTCTCCCTTC   |
| <i>ssc-miR-143-3p</i>  | F: TGAGATGAAGCACTGTAGCTC                                 |
