# Supplementary material for: Effect of miR-143-3p from Extracellular Vesicles of Porcine Uterine Luminal Fluid on Porcine Trophoblast Cells
Source: MDPI journal article supplement (doi:10.3390/ani12233402), 2022-12-02
Supplement: s1 [file s1]

a

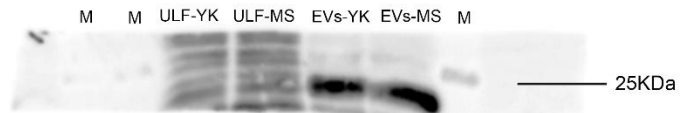

b

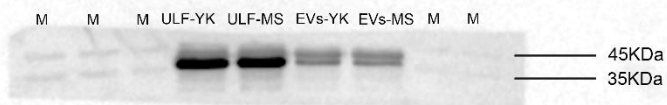

c

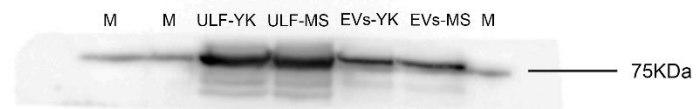

d

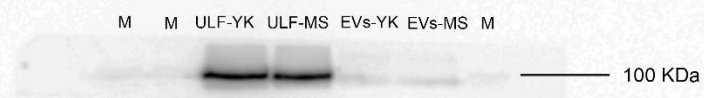

e

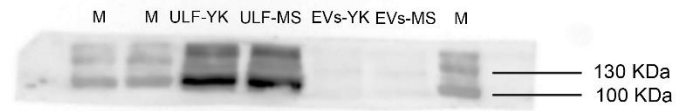

**Figure S1.** Original western blot figures for Figure 1D. (a) CD9, 25KDa. (b) TSG101, 44KDa. (c) HSP70, 70KDa. (d) Calnexin, 90KDa. (e) GM130, 112KDa. ULF: uterine luminal fluid, EVs: extracellular vesicles, YK: Yorkshire pigs, MS: Meishan pigs, M: marker.

**a**

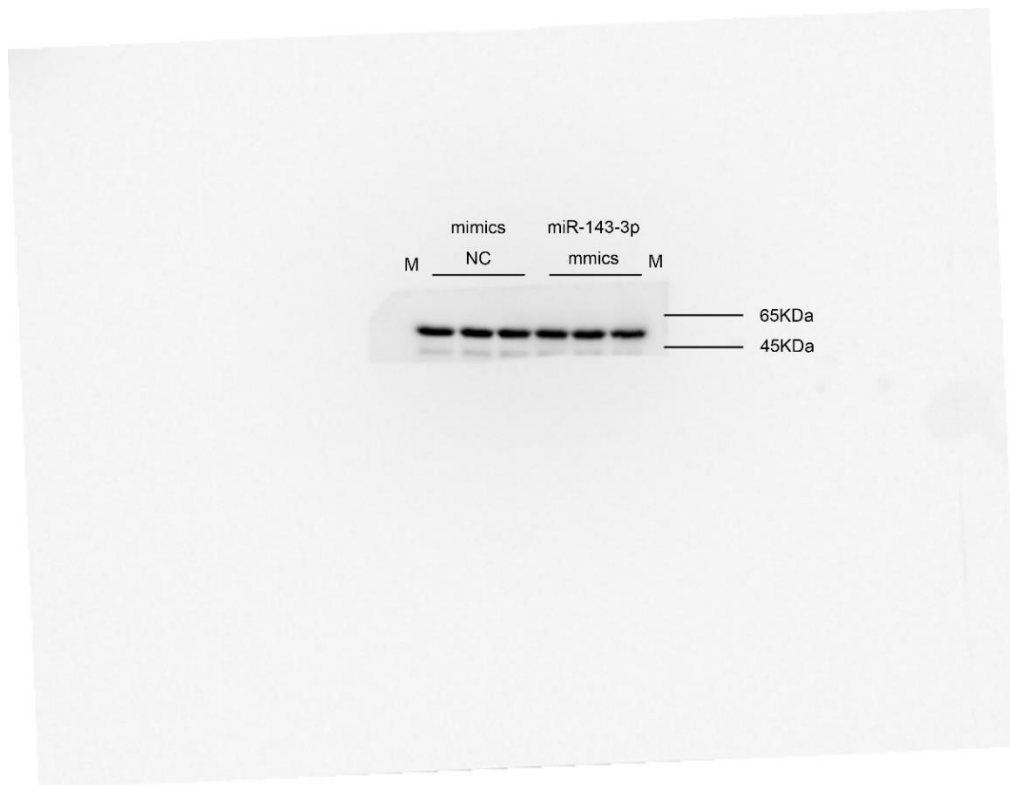

**b**

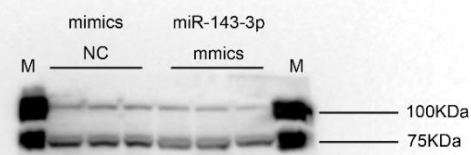

**Figure S2.** Original western blot figures for Figure 6E. **(a)**  $\beta$ -tubulin, 55KDa. **(b)** GPD2, 74KDa.

a

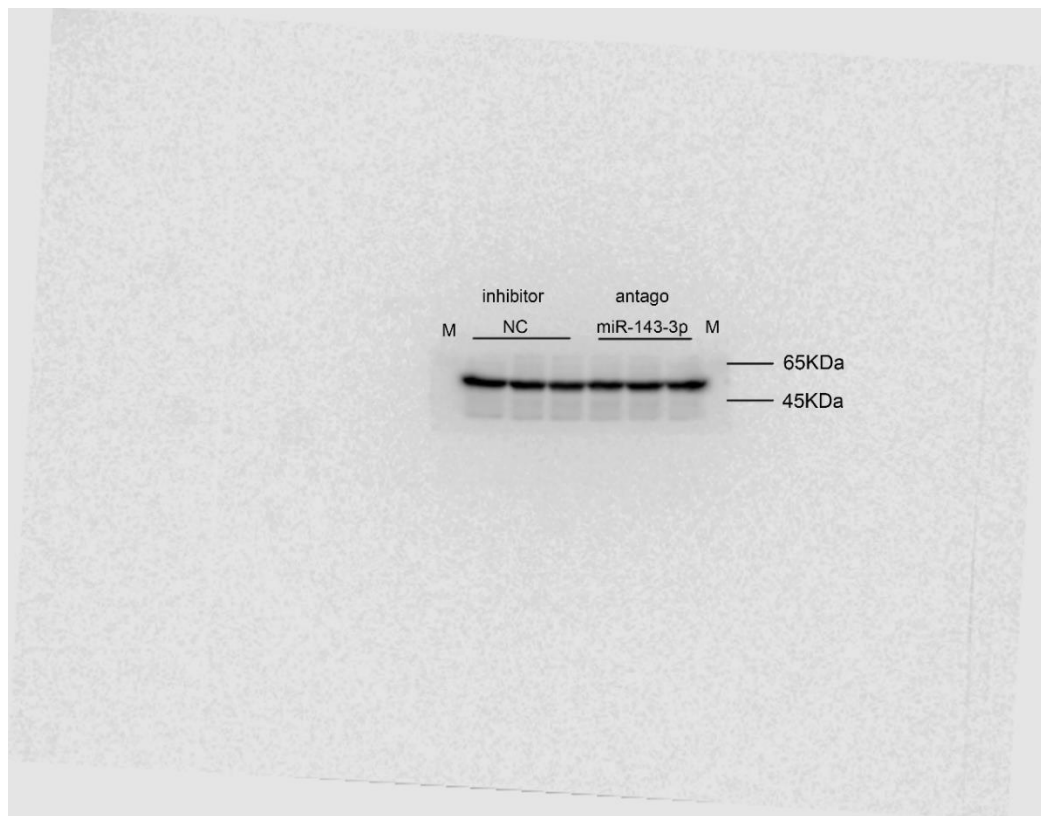

b

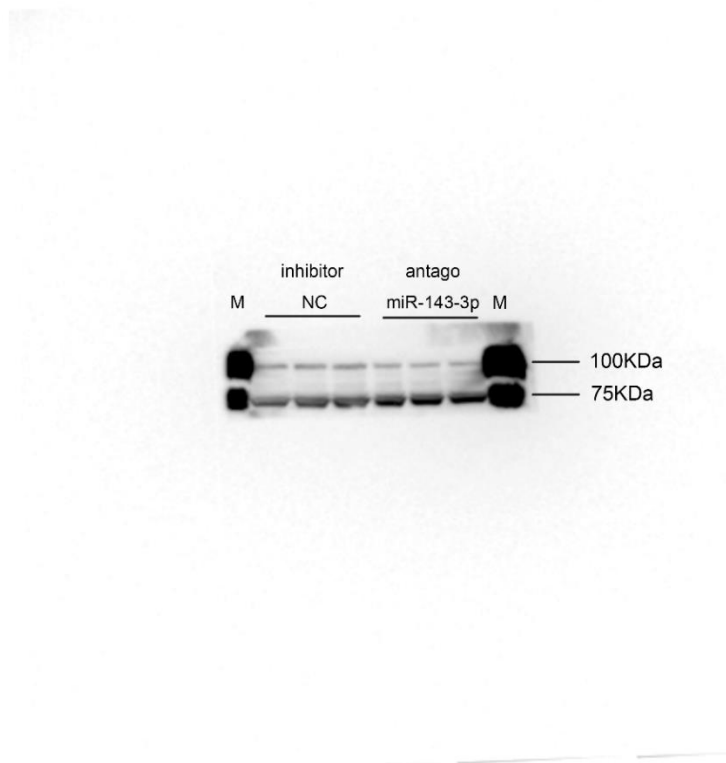

**Figure S3.** Original western blot figures for Figure 6F. (a)  $\beta$ -tubulin, 55KDa. (b) *GPD2*, 74KDa.
